# Supplementary material
Source: PubMed Central journal article supplement (PMC5818743)
Supplement: PRO-27-714-s001.pdf [file PRO-27-714-s001.pdf]

## **Supporting information**

**S1 Table. All PACMANS predicted fibrinogen  $\alpha$  chain cleavage sites by cathepsin K from PACMANS and how sequences relate to molecular docking models.** Blue sequences with molecule docking model with the cathepsin active site facing the fibrinogen chain were included in Fig 3B.

**S2 Table. All PACMANS predicted fibrinogen  $\beta$  chain cleavage sites by cathepsin K from PACMANS and how sequences relate to molecular docking models.** Blue sequences with molecule docking model with the cathepsin active site facing the fibrinogen chain were included in Fig 3B.

**S3 Table. All PACMANS predicted fibrinogen  $\gamma$  chain cleavage sites by cathepsin K from PACMANS and how sequences relate to molecular docking models.** Blue sequences with molecule docking model with the cathepsin active site facing the fibrinogen chain were included in Fig 3B.

**S4 Table. All PACMANS predicted fibrinogen  $\alpha$  chain cleavage sites by cathepsin L from PACMANS and how sequences relate to molecular docking models.** Blue sequences with molecule docking model with the cathepsin active site facing the fibrinogen chain were included in Fig 4B.

**S5 Table. All PACMANS predicted fibrinogen  $\beta$  chain cleavage sites by cathepsin L from PACMANS and how sequences relate to molecular docking models.** Blue sequences with

molecule docking model with the cathepsin active site facing the fibrinogen chain were included in Fig 4B.

**S6 Table. All PACMANS predicted fibrinogen  $\gamma$  chain cleavage sites by cathepsin L from PACMANS and how sequences relate to molecular docking models.** Blue sequences with molecule docking model with the cathepsin active site facing the fibrinogen chain were included in Fig 4B.

**S7 Table. All PACMANS predicted fibrinogen  $\alpha$  chain cleavage sites by cathepsin S from PACMANS and how sequences relate to molecular docking models.** Blue sequences with molecule docking model with the cathepsin active site facing the fibrinogen chain were included in Fig 5B.

**S8 Table. All PACMANS predicted fibrinogen  $\beta$  chain cleavage sites by cathepsin S from PACMANS and how sequences relate to molecular docking models.** Blue sequences with molecule docking model with the cathepsin active site facing the fibrinogen chain were included in Fig 5B.

**S9 Table. All PACMANS predicted fibrinogen  $\gamma$  chain cleavage sites by cathepsin S from PACMANS and how sequences relate to molecular docking models.** Blue sequences with molecule docking model with the cathepsin active site facing the fibrinogen chain were included in Fig 5B.

| Cumulative Score | Normalized Score | Fibriongen Sequence |          | Inclusion/Exclusion Rationale |                          |
|------------------|------------------|---------------------|----------|-------------------------------|--------------------------|
| 182              | 1.06             | 26                  | DFLAEGGG | 33                            | not in crystal structure |
| 170              | 1.00             | 821                 | YYPGGSYD | 828                           | not in crystal structure |
| 168              | 0.96             | 167                 | KRLEVDID | 174                           | allosteric/hairpin       |
| 165              | 0.96             | 667                 | TSLGGWLL | 674                           | not in crystal structure |
| 156              | 0.90             | 186                 | RALAREVD | 193                           | allosteric/hairpin       |
| 155              | 0.91             | 111                 | EILRGDFS | 118                           | active site facing       |
| 153              | 0.90             | 239                 | SQLQKVPP | 246                           | not in crystal structure |
| 152              | 0.87             | 202                 | KQLEQVIA | 209                           | active site facing       |
| 150              | 0.88             | 490                 | DCPEAMD  | 497                           | not in crystal structure |
| 150              | 0.88             | 769                 | GSVEEGAE | 776                           | not in crystal structure |
| 145              | 0.83             | 259                 | MELERPGG | 266                           | not in crystal structure |
| 145              | 0.84             | 726                 | VELEDWAG | 733                           | not in crystal structure |
| 144              | 0.84             | 262                 | ERPGGNEI | 269                           | not in crystal structure |
| 144              | 0.86             | 759                 | EGTAGDAL | 766                           | not in crystal structure |
| 143              | 0.82             | 535                 | PMLGEFVS | 542                           | not in crystal structure |
| 142              | 0.83             | 498                 | GTLSGIGT | 505                           | not in crystal structure |
| 141              | 0.84             | 396                 | DSPGSGNA | 403                           | not in crystal structure |
| 141              | 0.83             | 764                 | DALIEGSV | 771                           | not in crystal structure |
| 139              | 0.81             | 132                 | EDLRRIE  | 139                           | active site facing       |
| 138              | 0.82             | 244                 | VPPEWKAL | 251                           | not in crystal structure |
| 138              | 0.82             | 563                 | HHPGIAEF | 570                           | not in crystal structure |
| 136              | 0.79             | 27                  | FLAEGGGV | 34                            | not in crystal structure |
| 136              | 0.80             | 694                 | RGFGSLND | 701                           | not in crystal structure |
| 135              | 0.83             | 73                  | LIDEVNQD | 80                            | active site facing       |
| 135              | 0.80             | 192                 | VDLKDYED | 199                           | allosteric/hairpin       |
| 135              | 0.78             | 650                 | IKLPGSSK | 657                           | not in crystal structure |
| 135              | 0.79             | 765                 | ALIEGSVE | 772                           | not in crystal structure |
| 134              | 0.80             | 715                 | HLLTQRGS | 722                           | not in crystal structure |
| 133              | 0.79             | 21                  | DSGEGDFL | 28                            | not in crystal structure |
| 133              | 0.79             | 211                 | DLLPSRDR | 218                           | no docking models near   |
| 133              | 0.81             | 699                 | LNDEGEGE | 706                           | not in crystal structure |
| 132              | 0.80             | 844                 | VSFRGADY | 851                           | not in crystal structure |
| 131              | 0.79             | 9                   | LVLVVGT  | 16                            | not in crystal structure |
| 131              | 0.77             | 565                 | PGIAEFPS | 572                           | not in crystal structure |
| 130              | 0.78             | 103                 | HSLTTNIM | 110                           | no docking models near   |
| 130              | 0.75             | 495                 | MDLGTLSG | 502                           | not in crystal structure |
| 129              | 0.77             | 32                  | GGVRGPRV | 39                            | not in crystal structure |
| 128              | 0.75             | 90                  | NSLFEYQK | 97                            | active site facing       |
| 128              | 0.76             | 377                 | SSVSGSTG | 384                           | not in crystal structure |
| 128              | 0.75             | 627                 | RPVRDCDD | 634                           | not in crystal structure |
| 127              | 0.75             | 300                 | SGPGSTGN | 307                           | not in crystal structure |
| 127              | 0.75             | 326                 | SGPGSTGS | 333                           | not in crystal structure |
| 127              | 0.77             | 724                 | LRVELEDW | 731                           | not in crystal structure |

Supp Table 1

| Cumulative Score | Normalized Score | Fibrinogen Sequence |           | Inclusion/Exclusion Rationale |                          |
|------------------|------------------|---------------------|-----------|-------------------------------|--------------------------|
| 169              | 0.98             | 110                 | CQLQEALL  | 117                           | no docking models near   |
| 158              | 0.92             | 210                 | QKLESDVS  | 217                           | no docking models near   |
| 156              | 0.92             | 94                  | GCLHADPD  | 101                           | no docking models near   |
| 155              | 0.91             | 339                 | ELLIEMED  | 346                           | globular                 |
| 148              | 0.85             | 174                 | SELEKHQL  | 181                           | no docking models near   |
| 146              | 0.86             | 388                 | SQLMGENR  | 395                           | globular                 |
| 144              | 0.84             | 57                  | PSLRPAPP  | 64                            | not in crystal structure |
| 144              | 0.83             | 200                 | SILENLRS  | 207                           | active site facing       |
| 141              | 0.85             | 179                 | HQLYIDET  | 186                           | active site facing       |
| 139              | 0.82             | 376                 | RGTAGNAL  | 383                           | globular                 |
| 137              | 0.82             | 28                  | VKSQGVND  | 35                            | not in crystal structure |
| 137              | 0.84             | 105                 | LCPTGCQL  | 112                           | active site facing       |
| 136              | 0.82             | 59                  | LRPAPPPI  | 66                            | not in crystal structure |
| 133              | 0.78             | 203                 | ENLRSKIQ  | 210                           | active site facing       |
| 132              | 0.78             | 304                 | GNVATNTD  | 311                           | globular                 |
| 132              | 0.78             | 335                 | MGPTELLI  | 342                           | globular                 |
| 129              | 0.75             | 316                 | CGLPGEYW  | 323                           | globular                 |
| 127              | 0.76             | 89                  | APDAGGCL  | 96                            | no docking models near   |
| 127              | 0.75             | 317                 | GLPGEYWL  | 324                           | globular                 |
| 127              | 0.73             | 322                 | YWLGNDKI  | 329                           | globular                 |
| 126              | 0.73             | 115                 | ALLQQERP  | 122                           | no docking models near   |
| 125              | 0.73             | 254                 | MYLIQPDS  | 261                           | globular                 |
| 125              | 0.73             | 414                 | GWLTS DPR | 421                           | globular                 |
| 124              | 0.76             | 20                  | LLLLCVFL  | 27                            | not in crystal structure |
| 124              | 0.77             | 116                 | LLQQRPI   | 123                           | no docking models near   |
| 123              | 0.71             | 100                 | PDLGVLCP  | 107                           | no docking models near   |

| Cumulative Score | Normalized Score | Fibrinogen Sequence |          | Inclusion/Exclusion Rationale |
|------------------|------------------|---------------------|----------|-------------------------------|
| 166              | 0.98             | 426                 | HHLGGAKQ | 433 not in crystal structure  |
| 160              | 0.92             | 222                 | KRLDGSVD | 229 globular                  |
| 156              | 0.89             | 64                  | KDLQSLED | 71 allosteric                 |
| 156              | 0.91             | 274                 | VELEDWNG | 281 globular                  |
| 154              | 0.90             | 90                  | IQLTYNPD | 97 active site facing         |
| 153              | 0.91             | 445                 | DSLYPEDD | 452 not in crystal structure  |
| 150              | 0.89             | 305                 | AYFAGGDA | 312 globular                  |
| 148              | 0.84             | 114                 | KMLEEIMK | 121 active site facing        |
| 147              | 0.86             | 67                  | QSLEDILH | 74 allosteric                 |
| 147              | 0.85             | 155                 | AQLEAQCQ | 162 active site facing        |
| 143              | 0.83             | 416                 | NRLTIGEG | 423 globular                  |
| 141              | 0.82             | 134                 | RYLQEIYN | 141 active site facing        |
| 139              | 0.80             | 35                  | CILDERFG | 42 not in crystal structure   |
| 137              | 0.83             | 438                 | HPAETEYD | 445 not in crystal structure  |
| 136              | 0.83             | 244                 | LSPTGTTE | 251 globular                  |
| 135              | 0.80             | 148                 | VNLKEKVA | 155 no docking models near    |
| 135              | 0.80             | 293                 | VGPEADKY | 300 globular                  |
| 134              | 0.82             | 317                 | DGFDFGDD | 324 globular                  |
| 132              | 0.78             | 26                  | AYVATRDN | 33 not in crystal structure   |
| 130              | 0.78             | 18                  | LFLSSTCV | 25 not in crystal structure   |
| 128              | 0.75             | 3                   | WSLHPRNL | 10 not in crystal structure   |
| 127              | 0.77             | 272                 | LRVELEDW | 279 globular                  |
| 125              | 0.73             | 368                 | GHLNGVYY | 375 globular                  |

| Cumulative Score | Normalized Score | Fibrinogen Sequence |          | Inclusion/Exclusion Rationale |                          |
|------------------|------------------|---------------------|----------|-------------------------------|--------------------------|
| 1006             | 0.95             | 498                 | GTLSGIGT | 505                           | not in crystal structure |
| 962              | 0.90             | 667                 | TSLGGWLL | 674                           | not in crystal structure |
| 944              | 0.89             | 377                 | SSVSGSTG | 384                           | not in crystal structure |
| 941              | 0.88             | 432                 | KLVTSKGD | 439                           | not in crystal structure |
| 921              | 0.88             | 765                 | ALIEGSVE | 772                           | not in crystal structure |
| 914              | 0.86             | 742                 | FRVGSEAE | 749                           | not in crystal structure |
| 909              | 0.86             | 239                 | SQLQKVPP | 246                           | not in crystal structure |
| 897              | 0.84             | 694                 | RGFGSLND | 701                           | not in crystal structure |
| 888              | 0.83             | 26                  | DFLAEGGG | 33                            | not in crystal structure |
| 887              | 0.83             | 495                 | MDLGTLSG | 502                           | not in crystal structure |
| 878              | 0.83             | 481                 | EVVTSEDG | 488                           | not in crystal structure |
| 878              | 0.82             | 634                 | DVLQTHPS | 641                           | not in crystal structure |
| 877              | 0.83             | 447                 | EKVTSGST | 454                           | not in crystal structure |
| 863              | 0.82             | 111                 | EILRGDFS | 118                           | active site facing       |
| 852              | 0.80             | 8                   | CLVLSVVG | 15                            | not in crystal structure |
| 852              | 0.81             | 32                  | GGVRGPRV | 39                            | not in crystal structure |
| 846              | 0.80             | 326                 | SGPGSTGS | 333                           | not in crystal structure |
| 844              | 0.80             | 313                 | SGTGGTAT | 320                           | not in crystal structure |
| 837              | 0.80             | 769                 | GSVEEGAE | 776                           | not in crystal structure |
| 834              | 0.78             | 715                 | HLLTQRGS | 722                           | not in crystal structure |
| 832              | 0.79             | 756                 | SSYEGTAG | 763                           | not in crystal structure |
| 830              | 0.78             | 467                 | KTVIGPDG | 474                           | not in crystal structure |
| 829              | 0.78             | 259                 | MELERPGG | 266                           | not in crystal structure |
| 829              | 0.79             | 297                 | SGSSGPGS | 304                           | not in crystal structure |
| 828              | 0.79             | 414                 | EEVSGNVS | 421                           | not in crystal structure |
| 828              | 0.78             | 535                 | PMLGEFVS | 542                           | not in crystal structure |
| 823              | 0.78             | 697                 | GSLNDEGE | 704                           | not in crystal structure |
| 820              | 0.77             | 347                 | QNPGRPRP | 354                           | not in crystal structure |
| 816              | 0.77             | 501                 | SGIGTLDG | 508                           | not in crystal structure |
| 816              | 0.78             | 545                 | ESRGSESG | 552                           | not in crystal structure |
| 815              | 0.76             | 295                 | WNSGSSGP | 302                           | not in crystal structure |
| 806              | 0.76             | 323                 | PGSSGPGS | 330                           | not in crystal structure |
| 805              | 0.76             | 12                  | SVVGTAWT | 19                            | not in crystal structure |
| 805              | 0.75             | 186                 | RALAREVD | 193                           | no docking models near   |
| 805              | 0.76             | 300                 | SGPGSTGN | 307                           | not in crystal structure |
| 804              | 0.76             | 9                   | LVLSVVG  | 16                            | not in crystal structure |
| 803              | 0.76             | 650                 | IKLPGSSK | 657                           | not in crystal structure |
| 803              | 0.76             | 815                 | ANLNGIYY | 822                           | not in crystal structure |
| 800              | 0.76             | 753                 | LQVSSYEG | 760                           | not in crystal structure |
| 794              | 0.75             | 504                 | GTLDGFRH | 511                           | not in crystal structure |
| 791              | 0.75             | 339                 | SGTGSTGN | 346                           | not in crystal structure |
| 789              | 0.75             | 132                 | EDLRSRIE | 139                           | active site facing       |
| 789              | 0.74             | 321                 | WKPGSSGP | 328                           | not in crystal structure |

Supp Table 4

| Cumulative Score | Normalized Score | Fibrinogen Sequence |               | Inclusion/Exclusion Rationale |
|------------------|------------------|---------------------|---------------|-------------------------------|
| 936              | 0.89             | 115                 | ALLQQERP 122  | no docking models near        |
| 894              | 0.85             | 94                  | GCLHADPD 101  | no docking models near        |
| 894              | 0.85             | 414                 | GWLTS DPR 421 | globular                      |
| 885              | 0.83             | 57                  | PSLRPAPP 64   | not in crystal structure      |
| 862              | 0.81             | 26                  | FLVKSQGV 33   | not in crystal structure      |
| 842              | 0.79             | 210                 | QKLESDVS 217  | no docking models near        |
| 840              | 0.79             | 100                 | PDLGVLC P 107 | no docking models near        |
| 839              | 0.80             | 185                 | ETVNSNIP 192  | active site facing            |
| 823              | 0.78             | 330                 | SQLTRMGP 337  | globular                      |
| 822              | 0.78             | 339                 | ELLIEMED 346  | globular                      |
| 815              | 0.78             | 38                  | EGFFSARG 45   | not in crystal structure      |
| 813              | 0.76             | 196                 | RVLR SILE 203 | active site facing            |
| 802              | 0.77             | 58                  | SLRPAPPP 65   | not in crystal structure      |
| 795              | 0.76             | 203                 | ENLR SKIQ 210 | no docking models near        |
| 789              | 0.74             | 64                  | PPISGGGY 71   | not in crystal structure      |
| 782              | 0.74             | 233                 | IPV VSGKE 240 | globular                      |
| 782              | 0.74             | 301                 | QGFGNVAT 308  | globular                      |
| 782              | 0.74             | 388                 | SQLMGENR 395  | globular                      |
| 776              | 0.74             | 135                 | EAVSQTSS 142  | active site facing            |
| 776              | 0.73             | 381                 | NALMDGAS 388  | globular                      |
| 764              | 0.71             | 110                 | CQLQEALL 117  | no docking models near        |
| 750              | 0.71             | 200                 | SILEN LRS 207 | active site facing            |
| 745              | 0.71             | 214                 | SDVSAQME 221  | no docking models near        |
| 744              | 0.70             | 316                 | CGLPGEYW 323  | globular                      |
| 742              | 0.70             | 234                 | PV VSGKEC 241 | globular                      |
| 739              | 0.70             | 102                 | LGVLCPTG 109  | no docking models near        |

Supp Table 5

| Cumulative Score | Normalized Score | Fibrinogen Sequence |           | Inclusion/Exclusion Rationale |
|------------------|------------------|---------------------|-----------|-------------------------------|
| 989              | 0.92             | 426                 | HHLGGAKQ  | 433 not in crystal structure  |
| 915              | 0.87             | 239                 | EGFGHLSP  | 246 globular                  |
| 894              | 0.83             | 64                  | KDLQSLED  | 71 no docking models near     |
| 877              | 0.83             | 16                  | ALLFLSST  | 23 not in crystal structure   |
| 861              | 0.81             | 18                  | LFLSSTCV  | 25 not in crystal structure   |
| 861              | 0.80             | 222                 | KRLDGSVD  | 229 globular                  |
| 840              | 0.80             | 125                 | SILTHDSS  | 132 active site facing        |
| 828              | 0.78             | 259                 | IHLISTQS  | 266 globular                  |
| 827              | 0.78             | 39                  | ERFGSYCP  | 46 not in crystal structure   |
| 804              | 0.76             | 305                 | AYFAGGDA  | 312 globular                  |
| 803              | 0.76             | 155                 | AQLEAQCQ  | 162 allosteric facing         |
| 801              | 0.75             | 90                  | IQLTYNPD  | 97 active site facing         |
| 792              | 0.75             | 209                 | EIDGSGNG  | 216 globular                  |
| 786              | 0.75             | 190                 | SGLYFIKP  | 197 globular                  |
| 785              | 0.75             | 242                 | GHLSPGT   | 249 globular                  |
| 785              | 0.75             | 368                 | GHLNGVYY  | 375 globular                  |
| 770              | 0.72             | 306                 | YFAGGDAG  | 313 globular                  |
| 769              | 0.73             | 17                  | LLFLSSTC  | 24 not in crystal structure   |
| 766              | 0.72             | 262                 | ISTQSAIP  | 269 globular                  |
| 759              | 0.71             | 416                 | NRLTIGEG  | 423 globular                  |
| 758              | 0.71             | 291                 | FKVGPEAD  | 298 globular                  |
| 748              | 0.70             | 53                  | DFLSTYQT  | 60 allosteric facing          |
| 748              | 0.71             | 108                 | ATLKSARKM | 115 active site facing        |



| Cumulative Score | Normalized Score | Fibriongen Sequence |          | Inclusion/Exclusion Rationale |                          |
|------------------|------------------|---------------------|----------|-------------------------------|--------------------------|
| 735              | 0.99             | 26                  | DFLAEGGG | 33                            | not in crystal structure |
| 696              | 0.94             | 498                 | GTLSGIGT | 505                           | not in crystal structure |
| 685              | 0.93             | 377                 | SSVSGSTG | 384                           | not in crystal structure |
| 682              | 0.93             | 481                 | EVVTSEGD | 488                           | not in crystal structure |
| 674              | 0.91             | 769                 | GSVEEGAE | 776                           | not in crystal structure |
| 665              | 0.89             | 742                 | FRVGSEAE | 749                           | not in crystal structure |
| 642              | 0.87             | 239                 | SQLQKVPP | 246                           | not in crystal structure |
| 638              | 0.86             | 259                 | MELERPGG | 266                           | not in crystal structure |
| 637              | 0.85             | 432                 | KLVTSKGD | 439                           | not in crystal structure |
| 636              | 0.86             | 634                 | DVLQTHPS | 641                           | not in crystal structure |
| 636              | 0.86             | 726                 | VELEDWAG | 733                           | not in crystal structure |
| 627              | 0.85             | 447                 | EKVTSGST | 454                           | not in crystal structure |
| 624              | 0.84             | 495                 | MDLGTLSG | 502                           | not in crystal structure |
| 621              | 0.84             | 697                 | GSLNDEGE | 704                           | not in crystal structure |
| 621              | 0.83             | 715                 | HLLTQRGS | 722                           | not in crystal structure |
| 618              | 0.83             | 667                 | TSLGGWLL | 674                           | not in crystal structure |
| 607              | 0.82             | 9                   | LVLVVG   | 16                            | not in crystal structure |
| 597              | 0.81             | 753                 | LQVSSYEG | 760                           | not in crystal structure |
| 596              | 0.80             | 535                 | PMLGEFVS | 542                           | not in crystal structure |
| 595              | 0.81             | 414                 | EEVSGNVS | 421                           | not in crystal structure |
| 595              | 0.80             | 764                 | DALIEGSV | 771                           | not in crystal structure |
| 592              | 0.81             | 111                 | EILRGDFS | 118                           | active site facing       |
| 591              | 0.79             | 249                 | KALTDMPQ | 256                           | not in crystal structure |
| 590              | 0.80             | 12                  | SVVGTAWT | 19                            | not in crystal structure |
| 588              | 0.79             | 296                 | NSGSSGPG | 303                           | not in crystal structure |
| 588              | 0.80             | 765                 | ALIEGSVE | 772                           | not in crystal structure |
| 583              | 0.78             | 8                   | CLVLSVVG | 15                            | not in crystal structure |
| 581              | 0.79             | 800                 | AEVYGGGW | 807                           | not in crystal structure |
| 579              | 0.79             | 365                 | SERGSAGH | 372                           | not in crystal structure |
| 578              | 0.79             | 539                 | EFVSETES | 546                           | not in crystal structure |
| 576              | 0.78             | 132                 | EDLRSRIE | 139                           | active site facing       |
| 572              | 0.77             | 211                 | DLLPSRDR | 218                           | no docking models near   |
| 572              | 0.76             | 467                 | KTVIGPDG | 474                           | not in crystal structure |
| 567              | 0.76             | 751                 | YALQVSSY | 758                           | not in crystal structure |
| 567              | 0.77             | 756                 | SSYEGTAG | 763                           | not in crystal structure |
| 565              | 0.77             | 326                 | SGPGSTGS | 333                           | not in crystal structure |
| 565              | 0.76             | 605                 | DEAGSEAD | 612                           | not in crystal structure |
| 564              | 0.77             | 313                 | SGTGGTAT | 320                           | not in crystal structure |
| 560              | 0.76             | 815                 | ANLNGIYY | 822                           | not in crystal structure |
| 559              | 0.75             | 322                 | KPGSSGPG | 329                           | not in crystal structure |
| 556              | 0.76             | 339                 | SGTGSTGN | 346                           | not in crystal structure |
| 555              | 0.74             | 186                 | RALAREVD | 193                           | no docking models near   |
| 553              | 0.75             | 545                 | ESRGSESG | 552                           | not in crystal structure |

Supp Table 7

| Cumulative Score | Normalized Score | Fibrinogen Sequence |           | Inclusion/Exclusion Rationale |                          |
|------------------|------------------|---------------------|-----------|-------------------------------|--------------------------|
| 652              | 0.89             | 115                 | ALLQQERP  | 122                           | no docking models near   |
| 646              | 0.87             | 94                  | GCLHADPD  | 101                           | no docking models near   |
| 644              | 0.87             | 414                 | GWLTS DPR | 421                           | globular                 |
| 639              | 0.86             | 57                  | PSLRPAPP  | 64                            | not in crystal structure |
| 614              | 0.84             | 135                 | EAVSQ TSS | 142                           | active site facing       |
| 611              | 0.82             | 381                 | NALMDGAS  | 388                           | globular                 |
| 605              | 0.82             | 210                 | QKLESDVS  | 217                           | no docking models near   |
| 585              | 0.80             | 114                 | EALLQQER  | 121                           | no docking models near   |
| 579              | 0.77             | 110                 | CQLQEALL  | 117                           | no docking models near   |
| 578              | 0.79             | 339                 | ELLIEMED  | 346                           | globular                 |
| 577              | 0.78             | 330                 | SQLTRMGP  | 337                           | globular                 |
| 575              | 0.77             | 196                 | RVLRSILE  | 203                           | active site facing       |
| 573              | 0.77             | 100                 | PDLGVLC P | 107                           | no docking models near   |
| 572              | 0.78             | 203                 | ENLRSKI Q | 210                           | active site facing       |
| 571              | 0.78             | 185                 | ETVNSNIP  | 192                           | active site facing       |
| 570              | 0.77             | 26                  | FLVKSQGV  | 33                            | not in crystal structure |
| 567              | 0.77             | 214                 | SDVSAQME  | 221                           | no docking models near   |
| 563              | 0.76             | 132                 | NNVEAVSQ  | 139                           | active site facing       |
| 563              | 0.76             | 233                 | IPV VSGKE | 240                           | globular                 |
| 552              | 0.75             | 200                 | SILENLRS  | 207                           | active site facing       |
| 548              | 0.74             | 64                  | PPISGGGY  | 71                            | not in crystal structure |
| 546              | 0.74             | 25                  | VFLVKSQG  | 32                            | not in crystal structure |
| 546              | 0.74             | 234                 | PV VSGKEC | 241                           | globular                 |
| 546              | 0.74             | 388                 | SQLMGENR  | 395                           | globular                 |
| 540              | 0.73             | 128                 | DELNNNVE  | 135                           | active site facing       |
| 539              | 0.72             | 254                 | MYLIQPDS  | 261                           | globular                 |

Supp Table 8

| Cumulative Score | Normalized Score | Fibrinogen Sequence | Inclusion/Exclusion Rationale |
|------------------|------------------|---------------------|-------------------------------|
| 687              | 0.92             | 426 HHLGGAKQ 433    | not in crystal structure      |
| 634              | 0.86             | 18 LFLSSTCV 25      | not in crystal structure      |
| 632              | 0.86             | 155 AQLAQCCQ 162    | active site facing            |
| 630              | 0.84             | 64 KDLQSLED 71      | no binding                    |
| 604              | 0.81             | 90 IQLTYNPD 97      | no docking models near        |
| 595              | 0.80             | 416 NRLTIGEG 423    | globular                      |
| 593              | 0.80             | 274 VELEDWNG 281    | globular                      |
| 589              | 0.80             | 209 EIDGSGNG 216    | globular                      |
| 584              | 0.79             | 125 SILTHDSS 132    | active site facing            |
| 581              | 0.79             | 16 ALLFLSST 23      | not in crystal structure      |
| 580              | 0.77             | 222 KRLDGSVD 229    | globular                      |
| 579              | 0.78             | 242 GHLSPTGT 249    | globular                      |
| 570              | 0.77             | 259 IHLISTQS 266    | globular                      |
| 561              | 0.76             | 305 AYFAGGDA 312    | globular                      |
| 550              | 0.74             | 67 QSLEDILH 74      | no docking models near        |
| 537              | 0.73             | 53 DFLSTYQT 60      | active site facing            |
| 536              | 0.72             | 71 DILHQVEN 78      | no docking models near        |
| 536              | 0.72             | 291 FKVGPEAD 298    | globular                      |
| 535              | 0.73             | 368 GHLNGVYY 375    | globular                      |
| 532              | 0.71             | 35 CILDERFG 42      | not in crystal structure      |
| 531              | 0.71             | 196 KPLKANQQ 203    | globular                      |
| 529              | 0.72             | 445 DSLYPEDD 452    | not in crystal structure      |
| 524              | 0.70             | 306 YFAGGDAG 313    | globular                      |
